# Supplementary material
Source: publisher site journal article supplement (https://static.cambridge.org/content/id/urn:cambridge.org:id:article:S1935789319000740/resource/name/S1935789319000740supp001.pdf)

# PRIOR Algorithm

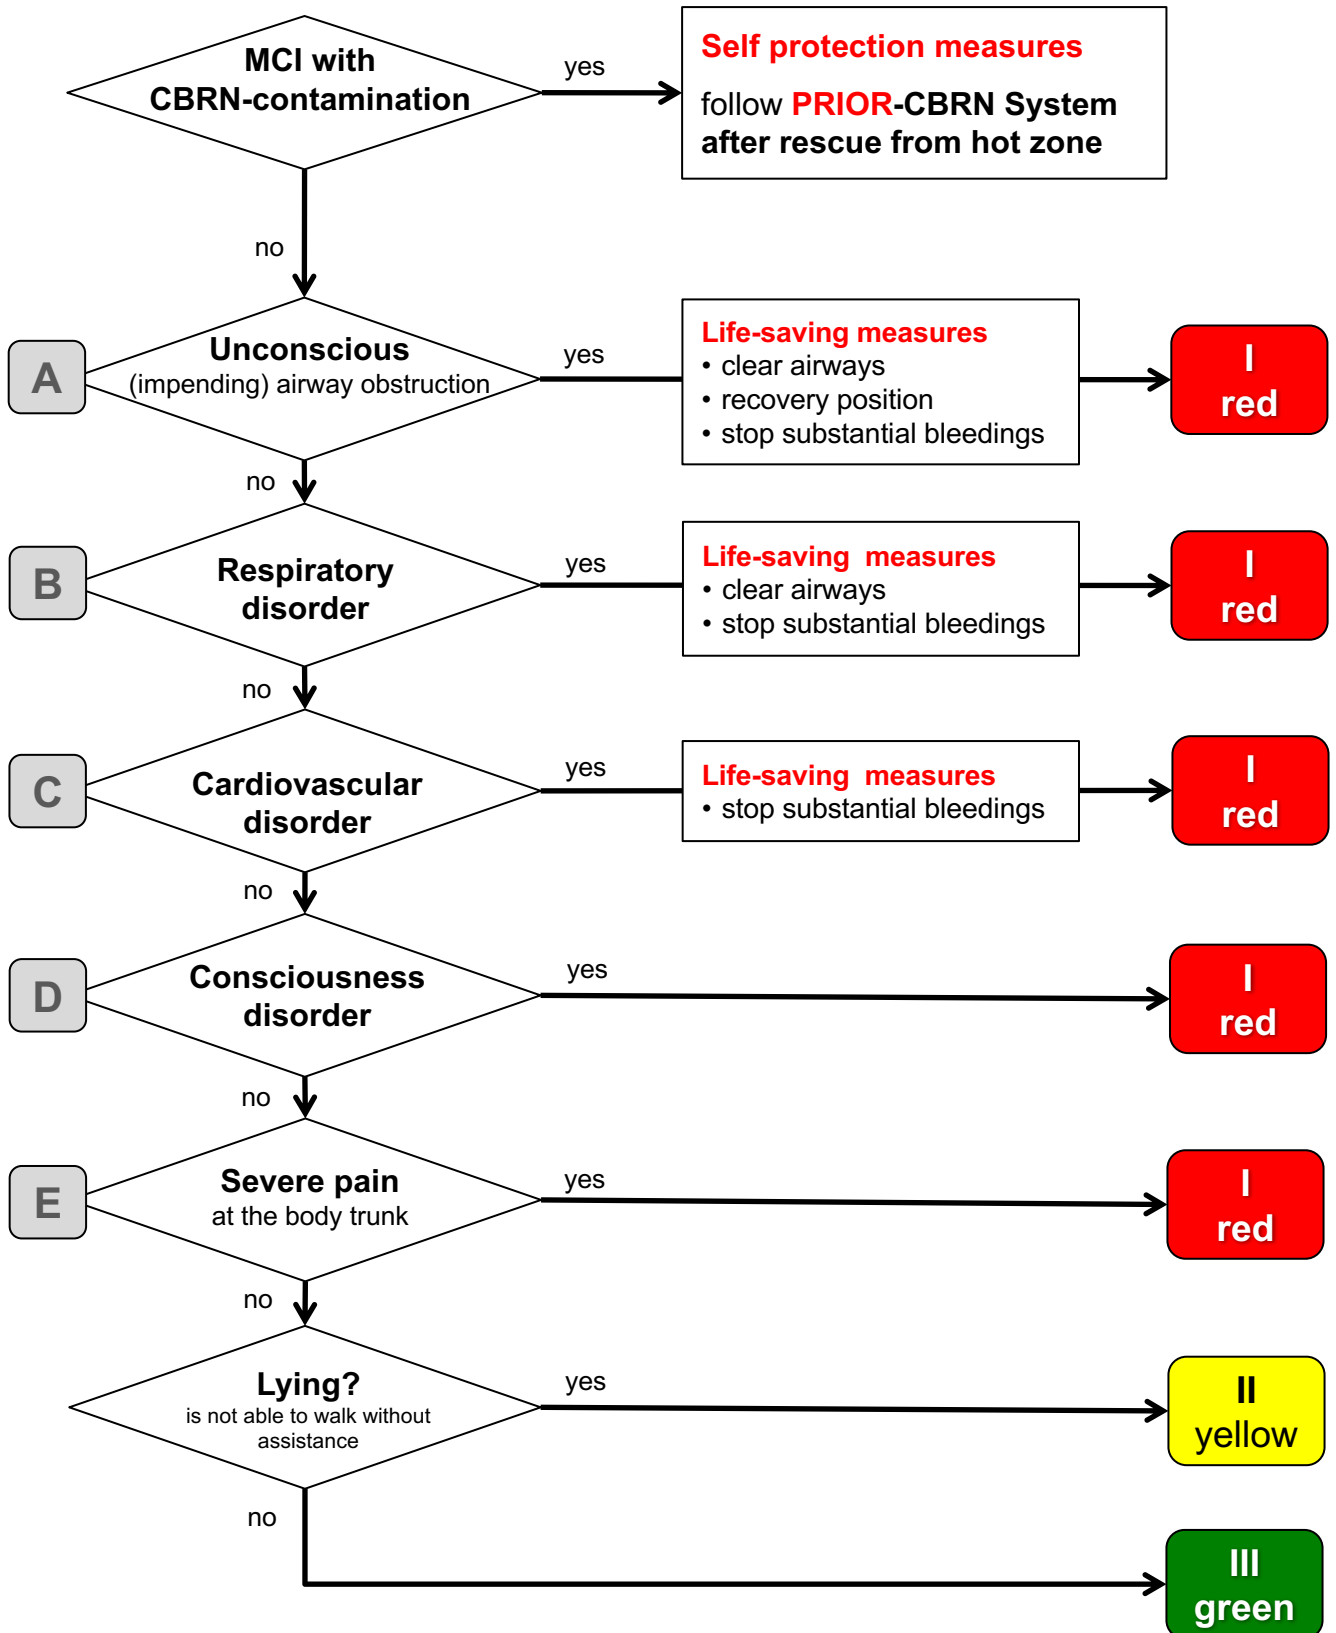

## PRIOR Indicators

## Possible additional indicators with children

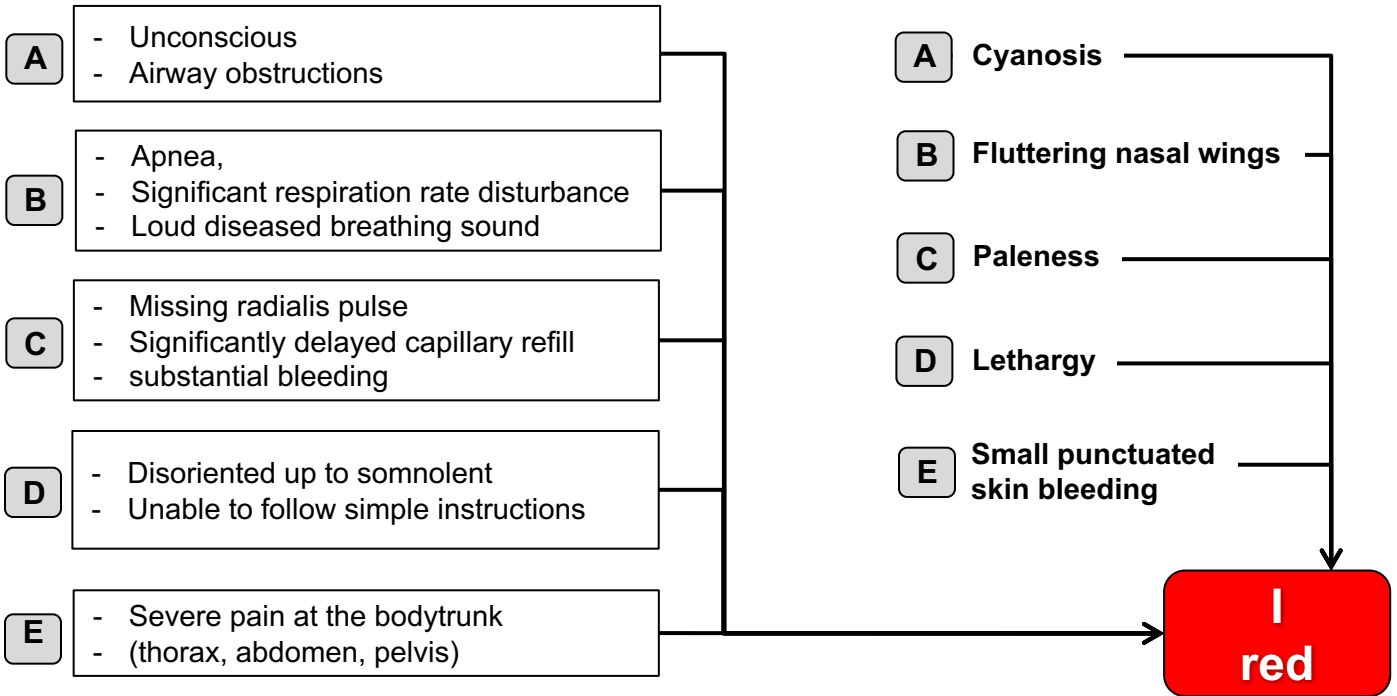

## PRIOR Diamond

- Rate the needs of treatment and transports
- Request the requirements
- Insert the requirements into common briefings with police and fire service

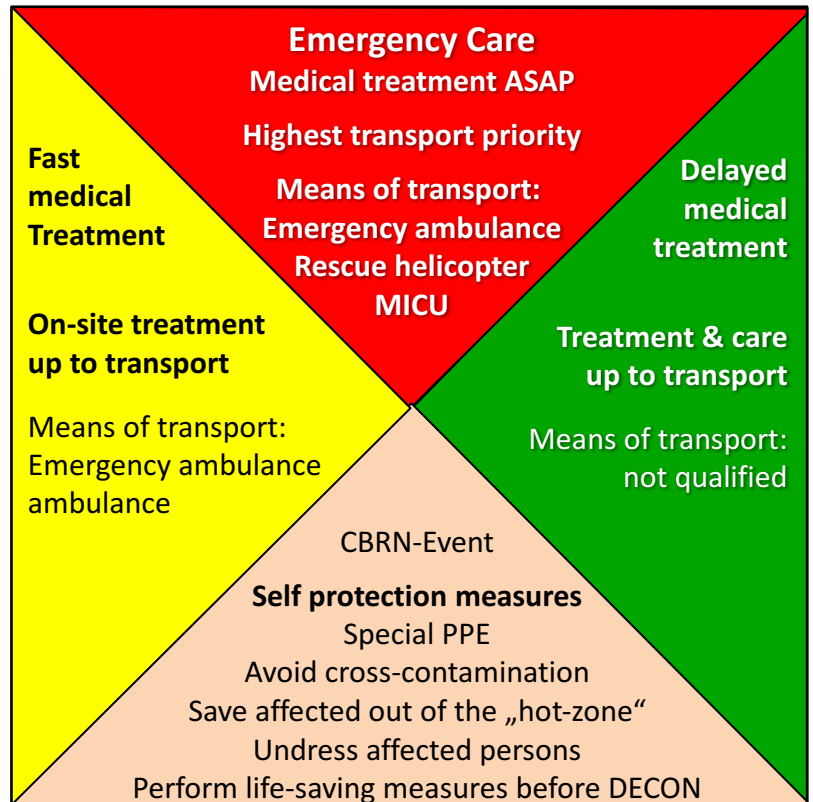

Supplement: Supplementary file 1 [file S1935789319000740supp001.pdf]
